# Supplementary material
Source: HighWire-hosted journal article supplement (https://erj.ersjournals.com/content/56/1/2001607)
Supplement: inline-supplementary-material-1 [file inline-supplementary-material-1.pdf]

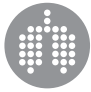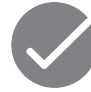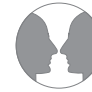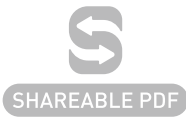

# Impact of COVID-19 lockdown on adherence to continuous positive airway pressure by obstructive sleep apnoea patients

David Attias<sup>1</sup>, Jean Louis Pepin<sup>2</sup> and Atul Pathak<sup>3</sup>

**Affiliations:** <sup>1</sup>Dept of Pulmonary and Sleep Medicine, Clinique Pasteur, Toulouse, France. <sup>2</sup>HP2 Laboratory, INSERM U1042, Grenoble Alpes University, Grenoble, France. <sup>3</sup>Dept of Cardiovascular Medicine, Princess Grace Hospital, Monaco, Monaco.

**Correspondence:** Atul Pathak, Dept of Cardiovascular Medicine, Princess Grace Hospital Centre, 1 Avenue Pasteur, Monaco 98012, Monaco, France. E-mail: atul.pathak@chpg.mc

 @ERSpublications

**In a large prospective cohort of sleep apnoea patients treated by CPAP, adherence to CPAP was significantly increased during the COVID-19 lockdown. This was associated with a shift of patients considered as low adherers to average or high adherers.** <https://bit.ly/3cBBOhs>

**Cite this article as:** Attias D, Pepin JL, Pathak A. Impact of COVID-19 lockdown on adherence to continuous positive airway pressure by obstructive sleep apnoea patients. *Eur Respir J* 2020; 56: 2001607 [<https://doi.org/10.1183/13993003.01607-2020>].

This single-page version can be shared freely online.

*To the Editor:*

The psychological effects of the coronavirus 2019 (COVID-19) lockdown and fear of aerosolisation made us think that adherence to continuous positive airway pressure (CPAP) treatment might be reduced and consequently the morbidity and mortality of vulnerable obstructive sleep apnoea (OSA) patients increased.
